# Supplementary material for: Tick salivary cystatin Iristatin limits the virus replication in skin of tick-borne encephalitis virus–infected mice
Source: PubMed Central journal article supplement (PMC11739226; doi:10.1007/s00436-024-08441-5), 2025-01-17
Supplement: 436_2024_8441_MOESM1_ESM.pdf [file 436_2024_8441_MOESM1_ESM.pdf]

## **Parasitology Research**

### **Tick salivary cystatin Iristatin limits the virus replication in skin of tick-borne encephalitis virus infected mice**

**Helena Langhansová <sup>1</sup>, Zuzana Beránková <sup>1</sup>, Ritesh Khanna <sup>1</sup>, Jan Kotál <sup>1</sup>, Michail Kotsyfakis <sup>3</sup>, Martin Palus<sup>2</sup>, Jaroslava Lieskovská <sup>1,2\*</sup>**

<sup>1</sup> Department of Medical Biology, Faculty of Science, University of South Bohemia, Branišovská 1760, CZ-37005 České Budějovice, Czech Republic

<sup>2</sup> Institute of Parasitology, Biology Centre of Czech Academy of Sciences, Branišovská 1160/31, CZ-37005 České Budějovice, Czech Republic

<sup>3</sup> Institute of Molecular Biology and Biotechnology, Foundation for Research and Technology-Hellas, N. Plastira 100, 70013, Heraklion, Crete, Greece

**\* Correspondence: [jlieskovska@prf.jcu.cz](mailto:jlieskovska@prf.jcu.cz)**

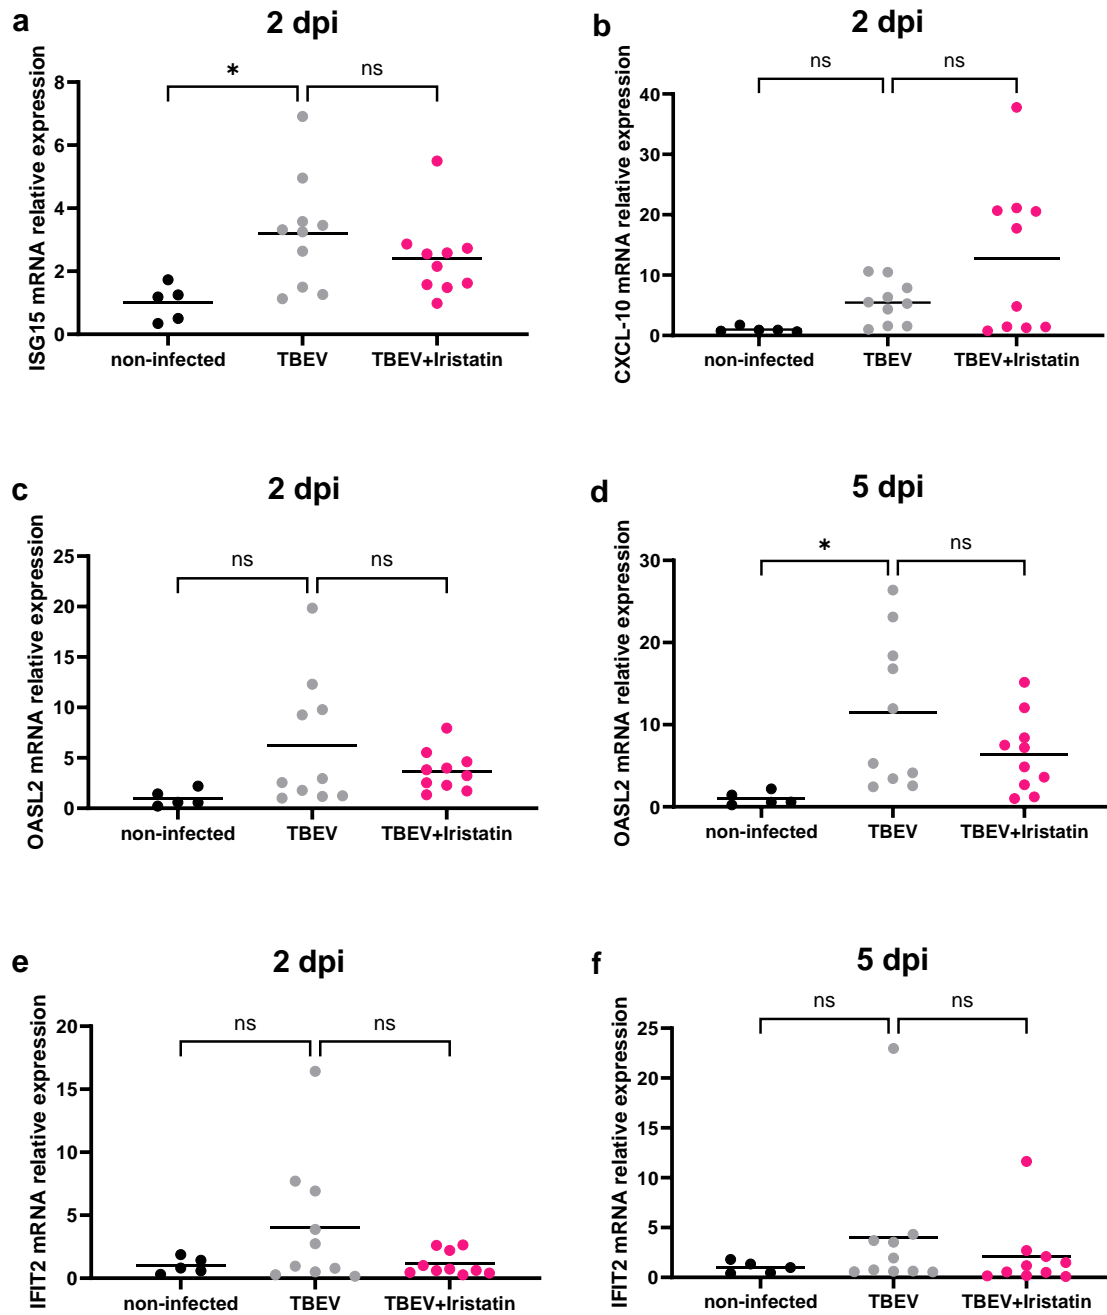

**Online Resource 1** The effect of Iristatin on the expression of interferon-responsive genes in the skin of TBEV-infected mice. Mice were i.d. infected with Hypr +/- Iristatin and the gene expressions of ISG15 (**a**), CXCL-10 (**b**), OASL2 (**c**, **d**), and IFIT2 (**e**, **f**) were evaluated on depicted days (2 and/or 5 dpi) in the skin of infected mice. mRNA expression was normalized to the Actb mRNA level and non-infected mice. \*  $p \leq 0.05$ ; ns = not significant

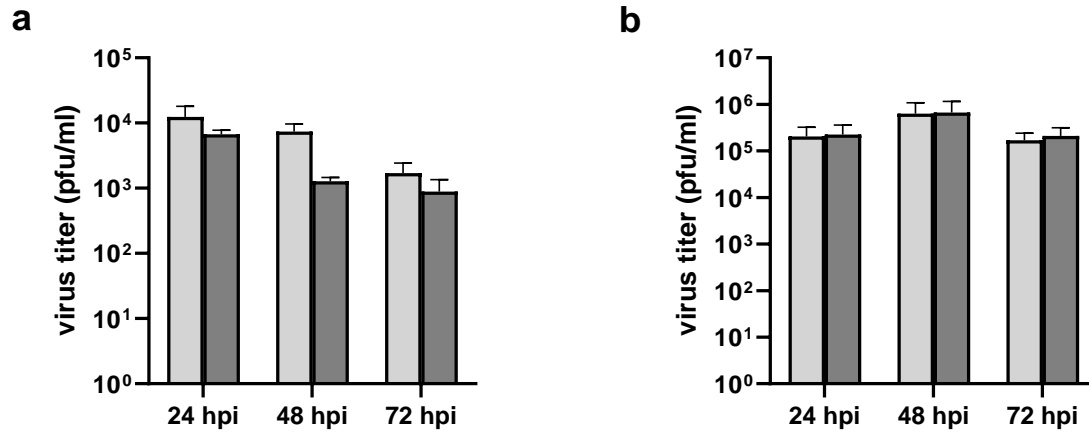

**Online Resource 2** The effect of Iristatin on virus multiplication in primary bone marrow macrophages (BMM; **a**) and dendritic cells (DC; **b**). BMM and DC were infected with Hypr (MOI 5) and incubated for 24, 48, and 72 h in the presence or absence of Iristatin (6  $\mu$ M). Viral titres were determined by plaque assay on indicated hours post infection. The mean of three independent experiments (+ SEM) is shown in the graphs. Differences between groups were not statistically significant.
